# Supplementary material
Source: PubMed Central journal article supplement (PMC2777807)
Supplement: NIHMS117991-supplement-1.pdf [file NIHMS117991-supplement-1.pdf]

**EFFECTS OF RENAL PERFUSION PRESSURE ON  
RENAL MEDULLARY H<sub>2</sub>O<sub>2</sub> AND NO PRODUCTION**

**Chunhua Jin<sup>1</sup>, Chunyan Hu<sup>2</sup>, Aaron Polichnowski<sup>1</sup>, Takefumi Mori<sup>1,2</sup>,  
Meredith Skelton<sup>1</sup>, Sadayoshi Ito<sup>2</sup>, and Allen W. Cowley, Jr.<sup>1</sup>**

**<sup>1</sup>Department of Physiology, Medical College of Wisconsin, Milwaukee, WI 53226**

**<sup>2</sup>Division of Nephrology, Endocrinology and Vascular Medicine, Tohoku University  
Graduate School of Medicine, Sendai, Japan**

**Running title: Pressure-induced renal oxidative stress**

**Corresponding author:**

Allen W. Cowley, Jr, Ph.D.  
Department of Physiology  
Medical College of Wisconsin  
8701 Watertown Plank Road  
Milwaukee, Wisconsin 53226  
Phone: 414-456-8724  
FAX: 414-456-6546  
Email: [cowley@mcw.edu](mailto:cowley@mcw.edu)

## Online Supplement

**Table S1:** Summary of results for Time Control studies run for three periods of 30 minutes to correspond to the periods of step changes in pressure.

A. Time control for H<sub>2</sub>O<sub>2</sub> measurements (n=7):

| Measurement                                                   | Period 1  | Period 2  | Period 3  |
|---------------------------------------------------------------|-----------|-----------|-----------|
| MAP (mmHg)                                                    | 110±4.9   | 111±5.0   | 110±4.8   |
| UNaV (μmol/min per g kwt)                                     | 3.14±0.6  | 3.54±0.4  | 4.01±0.5  |
| UV (μL/min per g kwt)                                         | 25.4±4.7  | 26.9±4.4  | 25.2±3.8  |
| Medullary Interstitial H <sub>2</sub> O <sub>2</sub> (nmol/L) | 928±33    | 978±34    | 1011±54   |
| UH <sub>2</sub> O <sub>2</sub> V (nmol/min per g kwt)         | 0.53±0.05 | 0.56±0.05 | 0.56±0.05 |

B. Time control for Nox measurements (n=7):

| Measurement                                                       | Period 1 | Period 2 | Period 3 |
|-------------------------------------------------------------------|----------|----------|----------|
| MAP (mmHg)                                                        | 110±3.9  | 111±3.8  | 110±3.9  |
| UNaV (μmol/min per g kwt)                                         | 3.97±0.4 | 4.47±0.6 | 3.86±0.6 |
| UV (μL/min per g kwt)                                             | 24.5±5.0 | 26.2±5.7 | 23.7±5.0 |
| Medullary Interstitial Nitrate (μmol/L)                           | 11.3±3.6 | 14.3±4.9 | 14.9±4.6 |
| U <sub>NO<sub>2</sub>+NO<sub>3</sub></sub> V (nmol/min per g kwt) | 6.3±1.3  | 7.3±1.8  | 8.6±1.9  |
